# Supplementary material for: RNA N6-Methyladenosine Affects Copper-Induced Oxidative Stress Response in Arabidopsis thaliana
Source: MDPI journal article supplement (doi:10.3390/ncrna10010008), 2024-01-19
Supplement: s1 [file s1]

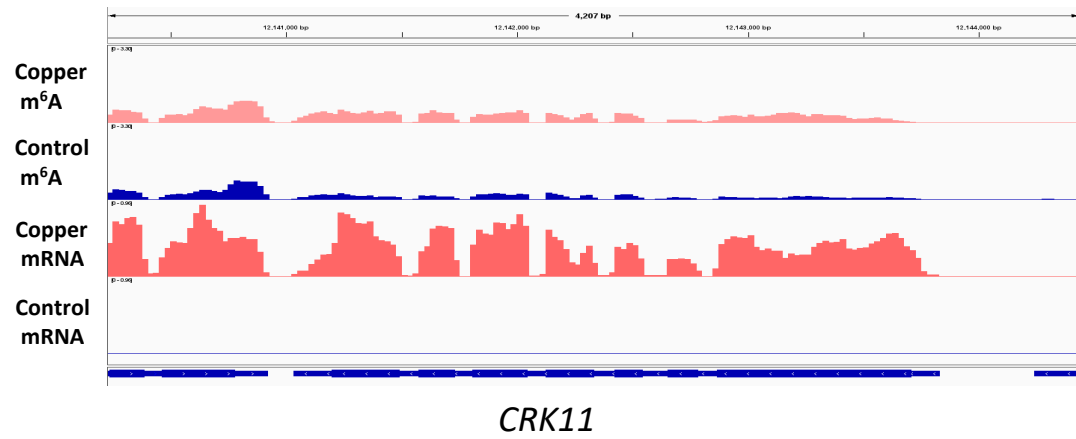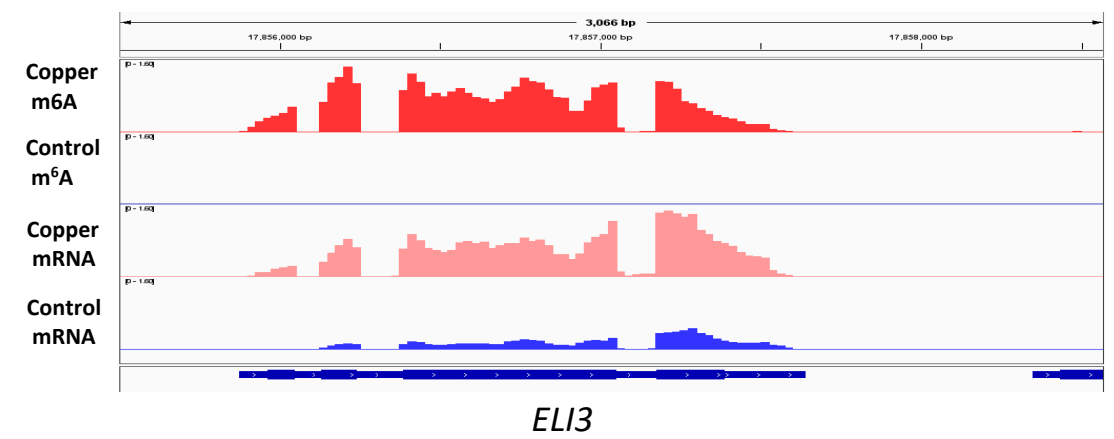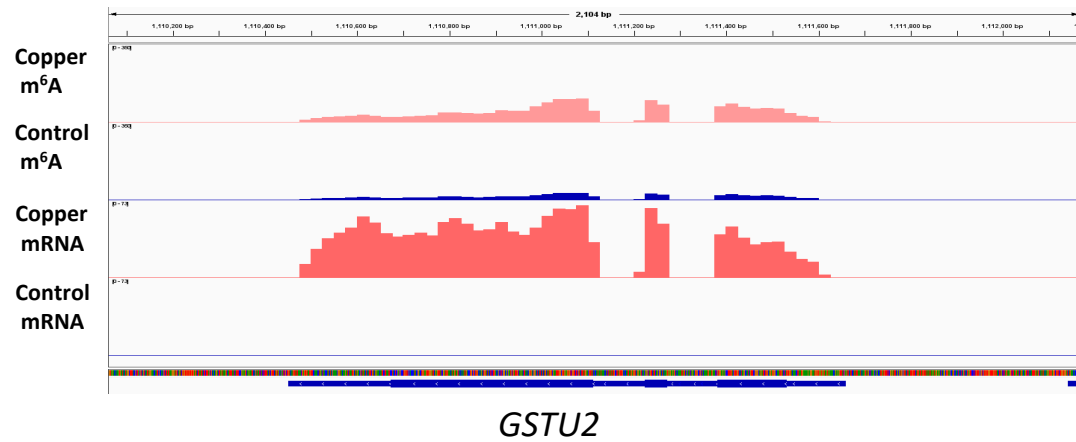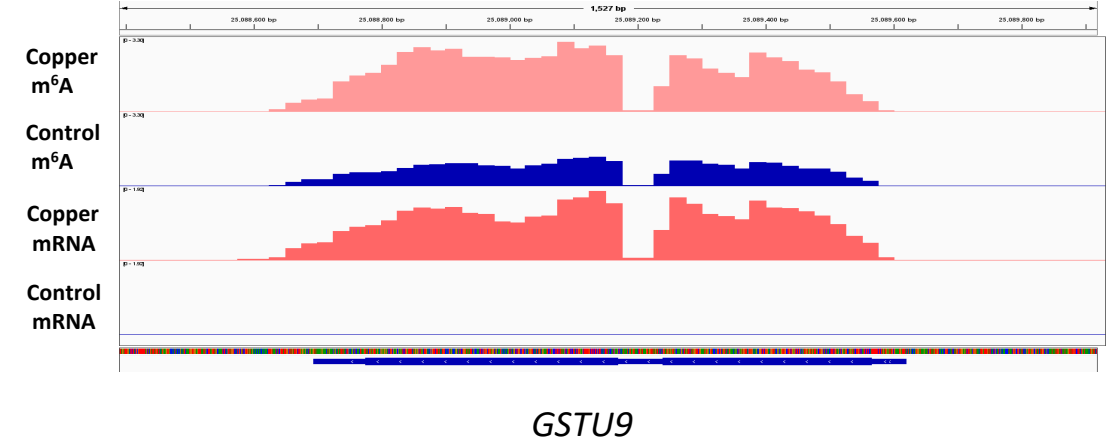

**Supplemental Figure S1: Example transcripts displaying copper-induced oxidative stress-specific m<sup>6</sup>A increases that correspond with increases in overall mRNA abundance of those transcripts.** The transcripts shown here are *CRK11*, *ELI3*, *GSTU2*, and *GSTU9* as indicated.

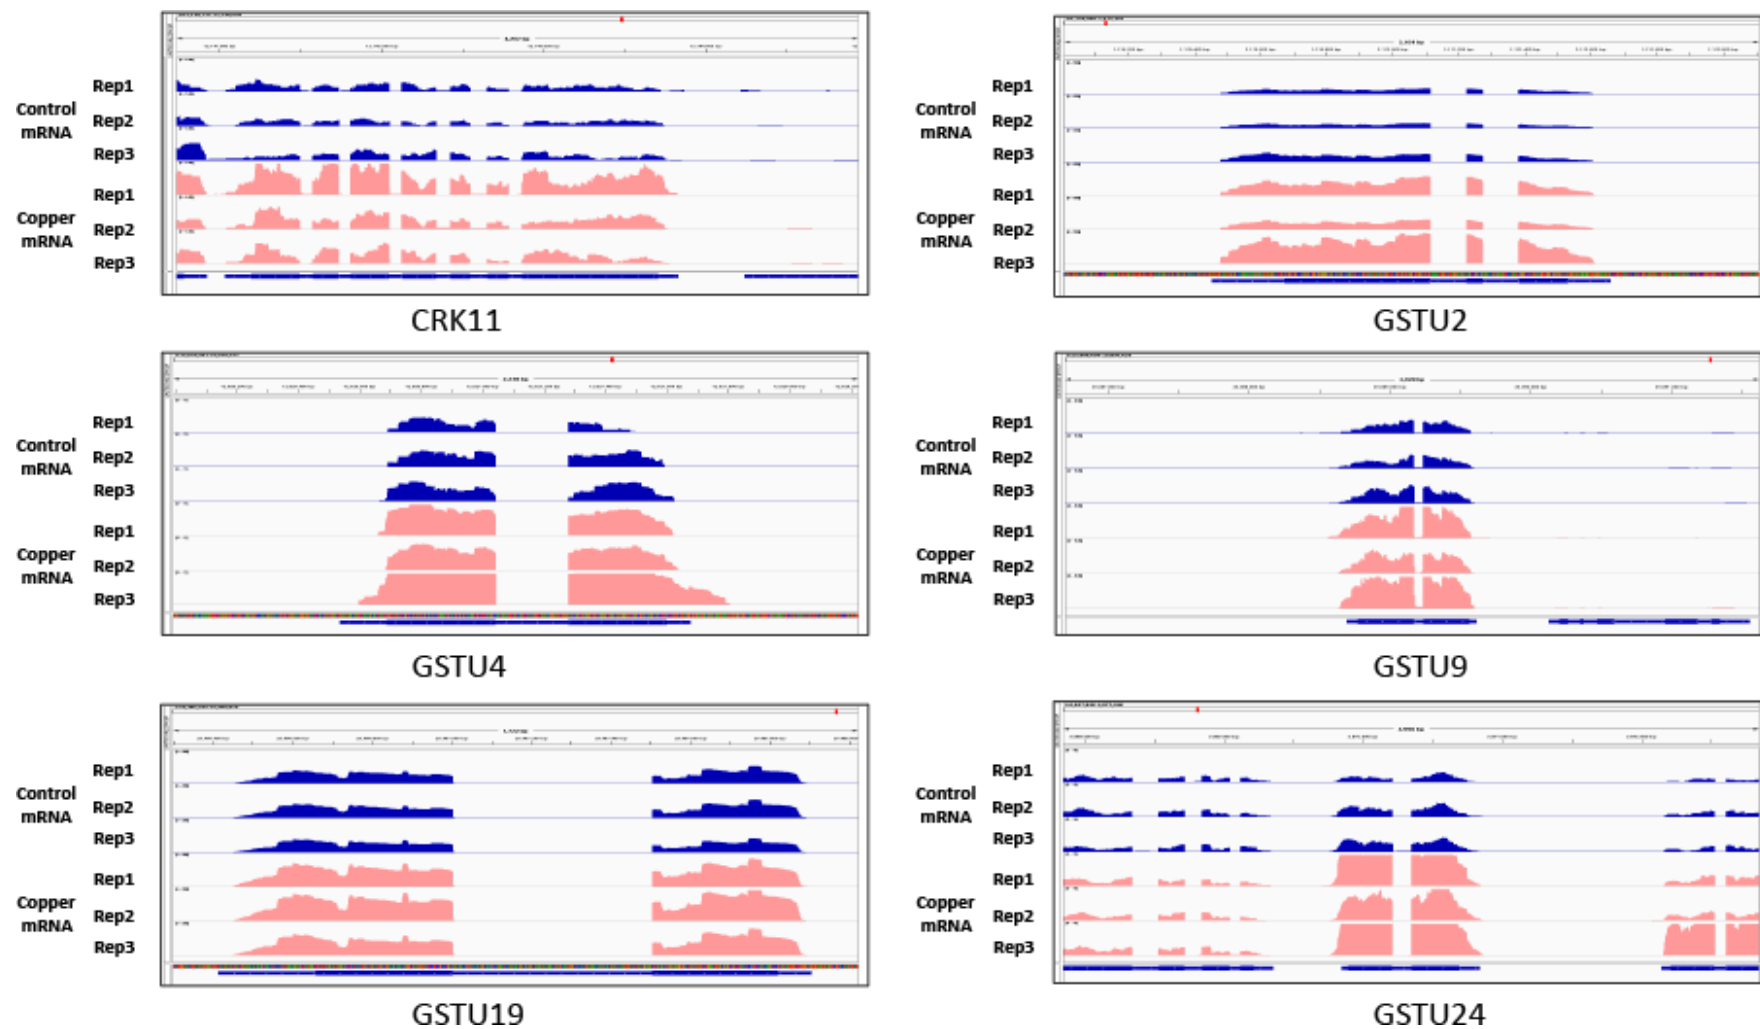

**Supplemental Figure S2: Example transcripts displaying copper-induced oxidative stress-specific increases in overall mRNA abundance of those transcripts.** The transcripts shown here are *CRK11*, *GSTU2*, *GSTU4*, *GSTU9*, *GSTU19*, and *GSTU24* as indicated.
